# Supplementary material for: Expression of TXNRD1, HSPA4L and ATP1B1 Genes Associated with the Freezability of Boar Sperm
Source: MDPI journal article supplement (doi:10.3390/ijms23169320), 2022-08-18
Supplement: s1 [file s1]

**Supplementary Table S1.** ANOVA results showing boar effects on the quality characteristics of frozen-thawed (FT) sperm.

| Sperm parameters                             | ANOVA (df = 9) |         |
|----------------------------------------------|----------------|---------|
|                                              | F-value        | p-value |
| Total motility (TMOT)                        | 29.090         | 0.001   |
| Progressive motility (PMOT)                  | 18.784         | 0.001   |
| Velocity straight line (VSL)                 | 43.500         | 0.001   |
| Velocity average path VAP)                   | 40.086         | 0.001   |
| Velocity curvilinear (VCL)                   | 27.928         | 0.001   |
| Straightness (STR)                           | 7.842          | 0.001   |
| Linearity (LIN)                              | 14.184         | 0.001   |
| Amplitude of lateral head displacement (ALH) | 28.778         | 0.001   |
| Beat cross frequency (BCF)                   | 23.294         | 0.006   |
| Mitochondrial membrane potential (MMP)       | 22.486         | 0.001   |
| Plasma membrane integrity (PMI)              | 15.125         | 0.001   |
| Normal apical ridge (NAR) acrosome integrity | 8.929          | 0.001   |
| DNA fragmentation                            | 6.922          | 0.001   |

VSL, VAP, VCL, ALH and BCF parameters were analyzed with the Kruskal–Wallis ANOVA test. Significant at  $p < 0.05$ ; df – degree of freedom
