# Supplementary material for: Expression of TXNRD1, HSPA4L and ATP1B1 Genes Associated with the Freezability of Boar Sperm
Source: MDPI journal article supplement (doi:10.3390/ijms23169320), 2022-08-18

**Supplementary Figure S1.** Sodium dodecyl sulfate-polyacrylamide gel electrophoresis (SDS-PAGE) profiles of proteins in fresh pre-freeze (PF) and frozen-thawed (FT) sperm from boars classified as having good and poor semen freezability (GSF and PSF, respectively). (A) GSF group (Boars no. 1 to 5). (B) PSF group (Boars no. 6 to 10). Samples were standardized (1.25 mg/ml), denatured, reduced and separated in 12% polyacrylamide gel. Arrow indicates the presence of an additional protein in either the fresh PF or FT sperm. MW – molecular weight standard

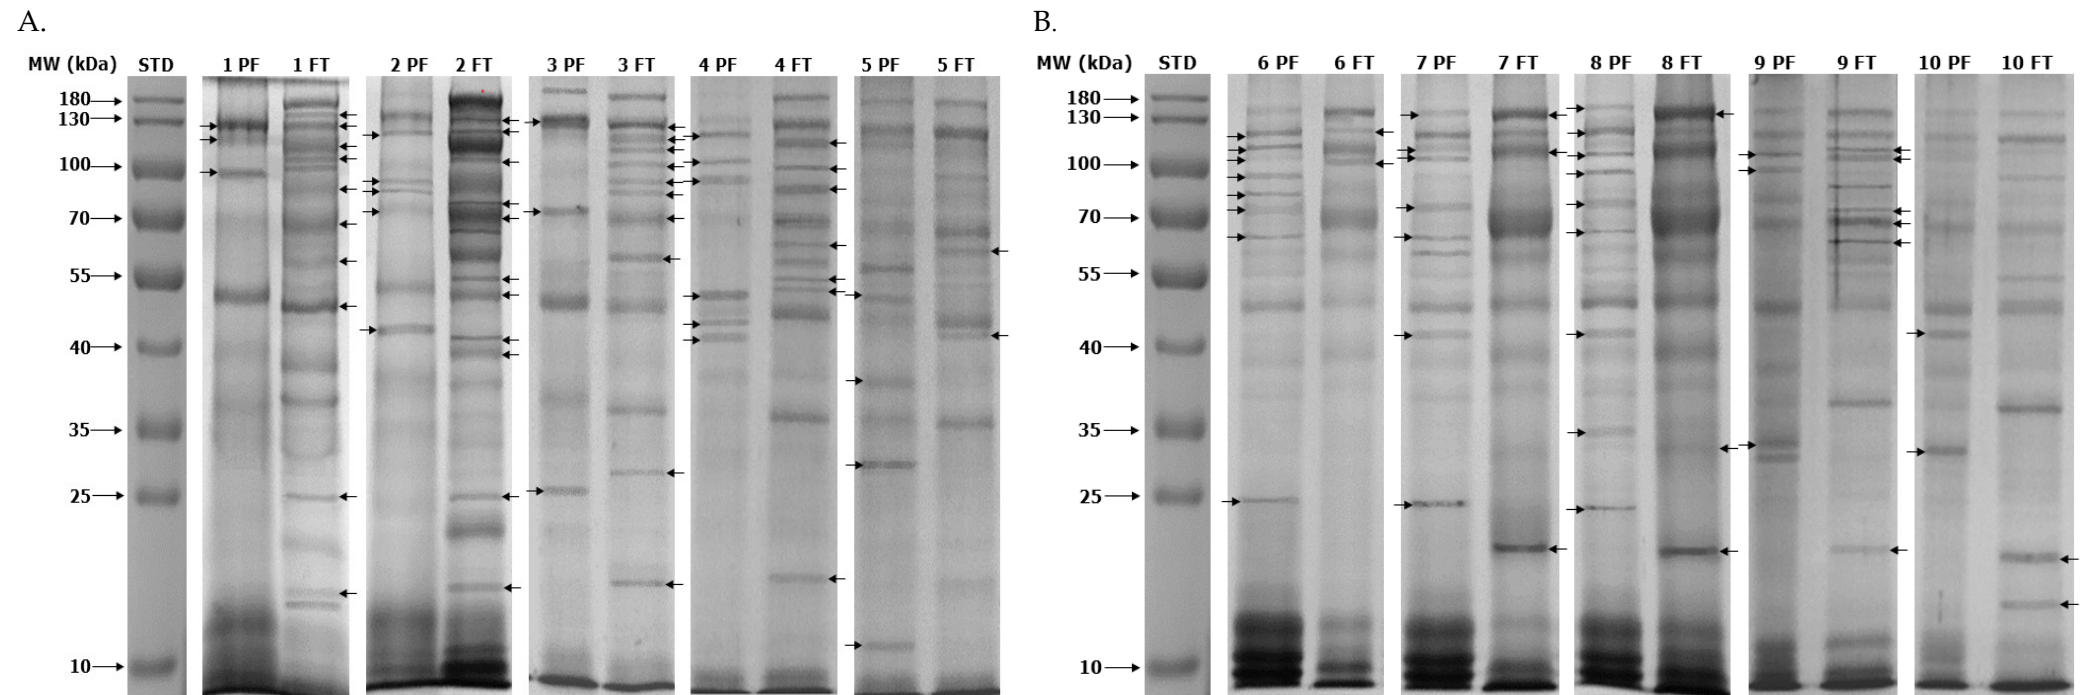

Supplement: s1 [file s1]
