# Supplementary material for: Expression of TXNRD1, HSPA4L and ATP1B1 Genes Associated with the Freezability of Boar Sperm
Source: Int J Mol Sci. 2022 Aug 18;23(16):9320. doi: 10.3390/ijms23169320 (PMC9409117; doi:10.3390/ijms23169320)
Supplement: Supplementary file 1 [file ijms-23-09320-s001.zip › ijms-1852801-supplementary/Supplementary Table S2.xlsx]

## Sheet: MF
Supplementary Table S2A. Gene ontology of molecular function (GO:MF) categories of TXNRD1, HSPA4L and ATP1B1 of boar sperm.
Functional category	id	Adjusted p-value	Negative log10 (adjusted p-value)	Total number of genes	Genes in list
glutathione oxidoreductase activity	GO:0097573	0.029887443893215737	1.5245112261631508	12	TXNRD1
ATPase activator activity	GO:0001671	0.029887443893215737	1.5245112261631508	15	ATP1B1
protein-disulfide reductase (NAD(P)) activity	GO:0047134	0.029887443893215737	1.5245112261631508	12	TXNRD1
oxidoreductase activity, acting on a sulfur group of donors, NAD(P) as acceptor	GO:0016668	0.029887443893215737	1.5245112261631508	13	TXNRD1
thioredoxin-disulfide reductase activity	GO:0004791	0.029887443893215737	1.5245112261631508	4	TXNRD1
molecular function activator activity	GO:0140677	0.03485580440439062	1.4577248901371458	21	ATP1B1
protein-disulfide reductase activity	GO:0015035	0.05149038033200112	1.2882739002590085	37	TXNRD1
disulfide oxidoreductase activity	GO:0015036	0.05149038033200112	1.2882739002590085	42	TXNRD1
ATPase binding	GO:0051117	0.05149038033200112	1.2882739002590085	57	ATP1B1
oxidoreductase activity, acting on a sulfur group of donors	GO:0016667	0.05149038033200112	1.2882739002590085	54	TXNRD1
antioxidant activity	GO:0016209	0.05149038033200112	1.2882739002590085	56	TXNRD1
flavin adenine dinucleotide binding	GO:0050660	0.057917892339307275	1.2371872507139363	70	TXNRD1
protein C-terminus binding	GO:0008022	0.08985639287195968	1.0464510193869545	118	ATP1B1
nucleotide binding	GO:0000166	0.09745071535207796	1.0112149685287117	1704	HSPA4L,TXNRD1
ATP hydrolysis activity	GO:0016887	0.09745071535207796	1.0112149685287117	147	HSPA4L
nucleoside phosphate binding	GO:1901265	0.09745071535207796	1.0112149685287117	1704	HSPA4L,TXNRD1
protein-macromolecule adaptor activity	GO:0030674	0.09745071535207796	1.0112149685287117	153	ATP1B1
catalytic activity, acting on a protein	GO:0140096	0.10490482746570409	0.9792045261679556	1924	HSPA4L,TXNRD1
molecular adaptor activity	GO:0060090	0.10490482746570409	0.9792045261679556	224	ATP1B1
anion binding	GO:0043168	0.10490482746570409	0.9792045261679556	1827	HSPA4L,TXNRD1
small molecule binding	GO:0036094	0.10490482746570409	0.9792045261679556	1939	HSPA4L,TXNRD1
protein serine/threonine kinase activity	GO:0004674	0.13260855529569282	0.8774284563395882	298	HSPA4L
protein kinase binding	GO:0019901	0.16157850521868602	0.791616413894406	453	ATP1B1
pyrophosphatase activity	GO:0016462	0.16157850521868602	0.791616413894406	459	HSPA4L
hydrolase activity, acting on acid anhydrides, in phosphorus-containing anhydrides	GO:0016818	0.16157850521868602	0.791616413894406	467	HSPA4L
nucleoside-triphosphatase activity	GO:0017111	0.16157850521868602	0.791616413894406	416	HSPA4L
ATP-dependent activity	GO:0140657	0.16157850521868602	0.791616413894406	451	HSPA4L
hydrolase activity, acting on acid anhydrides	GO:0016817	0.16157850521868602	0.791616413894406	467	HSPA4L
protein kinase activity	GO:0004672	0.17141477731595725	0.7659517411634568	533	HSPA4L
kinase binding	GO:0019900	0.17141477731595725	0.7659517411634568	515	ATP1B1
oxidoreductase activity	GO:0016491	0.18909090524892946	0.723329359019529	631	TXNRD1
phosphotransferase activity, alcohol group as acceptor	GO:0016773	0.18909090524892946	0.723329359019529	621	HSPA4L
kinase activity	GO:0016301	0.1947762150329055	0.7104640777994808	672	HSPA4L
ion binding	GO:0043167	0.1982382152242207	0.7028126209849692	3589	HSPA4L,TXNRD1
transferase activity, transferring phosphorus-containing groups	GO:0016772	0.21533899439119666	0.6668773193846025	794	HSPA4L
enzyme binding	GO:0019899	0.28643308390325123	0.5429768211169519	1404	ATP1B1
purine nucleotide binding	GO:0017076	0.28643308390325123	0.5429768211169519	1513	HSPA4L
ribonucleotide binding	GO:0032553	0.28643308390325123	0.5429768211169519	1509	HSPA4L
purine ribonucleotide binding	GO:0032555	0.28643308390325123	0.5429768211169519	1497	HSPA4L
adenyl ribonucleotide binding	GO:0032559	0.28643308390325123	0.5429768211169519	1187	HSPA4L
purine ribonucleoside triphosphate binding	GO:0035639	0.28643308390325123	0.5429768211169519	1455	HSPA4L
adenyl nucleotide binding	GO:0030554	0.28643308390325123	0.5429768211169519	1195	HSPA4L
ATP binding	GO:0005524	0.28643308390325123	0.5429768211169519	1150	HSPA4L
heterocyclic compound binding	GO:1901363	0.28643308390325123	0.5429768211169519	5309	HSPA4L,TXNRD1
catalytic activity	GO:0003824	0.28643308390325123	0.5429768211169519	4925	HSPA4L,TXNRD1
molecular function regulator	GO:0098772	0.28643308390325123	0.5429768211169519	1241	ATP1B1
organic cyclic compound binding	GO:0097159	0.28643308390325123	0.5429768211169519	5359	HSPA4L,TXNRD1
identical protein binding	GO:0042802	0.28643308390325123	0.5429768211169519	1426	HSPA4L
carbohydrate derivative binding	GO:0097367	0.31150719521386944	0.5065319175261906	1703	HSPA4L
transferase activity	GO:0016740	0.33041060867555405	0.48094601699545614	1862	HSPA4L
hydrolase activity	GO:0016787	0.3333939754661493	0.47704225227480124	1924	HSPA4L
protein binding	GO:0005515	0.38252636808602863	0.41733862294286833	6738	ATP1B1,HSPA4L
binding	GO:0005488	0.38252636808602863	0.41733862294286833	11721	ATP1B1,HSPA4L,TXNRD1
molecular function	GO:0003674	1	0	16247	ATP1B1,HSPA4L,TXNRD1

## Sheet: BP
Supplementary Table S2B. Gene ontology of biological process (GO:BP) categories of TXNRD1, HSPA4L and ATP1B1 of boar sperm.
Functional category	id	Adjusted p-value	Negative log10 (adjusted p-value)	Total number of genes	Genes in list
regulation of P-type sodium:potassium-exchanging transporter activity	GO:1903406	0.012488577432937076	1.9034870290567374	1	ATP1B1
positive regulation of potassium ion import across plasma membrane	GO:1903288	0.012488577432937076	1.9034870290567374	2	ATP1B1
positive regulation of calcium:sodium antiporter activity	GO:1903281	0.012488577432937076	1.9034870290567374	2	ATP1B1
regulation of calcium:sodium antiporter activity	GO:1903279	0.012488577432937076	1.9034870290567374	2	ATP1B1
positive regulation of sodium ion export across plasma membrane	GO:1903278	0.012488577432937076	1.9034870290567374	2	ATP1B1
regulation of sodium ion export across plasma membrane	GO:1903276	0.012488577432937076	1.9034870290567374	2	ATP1B1
positive regulation of P-type sodium:potassium-exchanging transporter activity	GO:1903408	0.012488577432937076	1.9034870290567374	1	ATP1B1
regulation of potassium ion import	GO:1903286	0.01311222954440685	1.8823234565549574	3	ATP1B1
de novo centriole assembly	GO:0097742	0.01311222954440685	1.8823234565549574	3	HSPA4L
de novo centriole assembly involved in multi-ciliated epithelial cell differentiation	GO:0098535	0.01311222954440685	1.8823234565549574	3	HSPA4L
sodium ion export across plasma membrane	GO:0036376	0.015892670078681427	1.7988031321808091	4	ATP1B1
multi-ciliated epithelial cell differentiation	GO:1903251	0.016808559123196086	1.7744695139052902	5	HSPA4L
cellular potassium ion homeostasis	GO:0030007	0.016808559123196086	1.7744695139052902	5	ATP1B1
positive regulation of centriole replication	GO:0046601	0.018728427782790952	1.727498679320842	6	HSPA4L
positive regulation of sodium ion transmembrane transporter activity	GO:2000651	0.02039196881632024	1.6905408416673884	7	ATP1B1
relaxation of cardiac muscle	GO:0055119	0.02056211169208999	1.6869322861199292	8	ATP1B1
positive regulation of sodium ion transmembrane transport	GO:1902307	0.02056211169208999	1.6869322861199292	8	ATP1B1
cellular sodium ion homeostasis	GO:0006883	0.021845949379332635	1.6606290770131815	9	ATP1B1
regulation of cardiac muscle contraction by calcium ion signaling	GO:0010882	0.022994373828363765	1.638378412425626	10	ATP1B1
positive regulation of potassium ion transmembrane transporter activity	GO:1901018	0.026210480166672802	1.581525022860105	12	ATP1B1
potassium ion import across plasma membrane	GO:1990573	0.02658719143492809	1.5753275373858078	14	ATP1B1
cellular homeostasis	GO:0019725	0.02658719143492809	1.5753275373858078	489	ATP1B1,TXNRD1
potassium ion homeostasis	GO:0055075	0.026876173238565757	1.570632568195836	15	ATP1B1
regulation of centriole replication	GO:0046599	0.026876173238565757	1.570632568195836	16	HSPA4L
positive regulation of sodium ion transport	GO:0010765	0.026876173238565757	1.570632568195836	16	ATP1B1
positive regulation of potassium ion transmembrane transport	GO:1901381	0.02710465204778474	1.5669561635428408	18	ATP1B1
cell redox homeostasis	GO:0045454	0.02710465204778474	1.5669561635428408	18	TXNRD1
positive regulation of potassium ion transport	GO:0043268	0.02816995551634162	1.5502138388155267	20	ATP1B1
positive regulation of calcium ion transmembrane transporter activity	GO:1901021	0.02816995551634162	1.5502138388155267	20	ATP1B1
cell differentiation involved in embryonic placenta development	GO:0060706	0.030015051297483508	1.5226609100727255	22	HSPA4L
metal ion export	GO:0070839	0.031747696162985006	1.4982877847028777	24	ATP1B1
sodium ion homeostasis	GO:0055078	0.03209595240675881	1.4935497326494986	25	ATP1B1
positive regulation of ATP-dependent activity	GO:0032781	0.03242416054393997	1.4891312589093866	26	ATP1B1
membrane repolarization	GO:0086009	0.03302693462031915	1.481131733279805	28	ATP1B1
regulation of sodium ion transmembrane transporter activity	GO:2000649	0.03302693462031915	1.481131733279805	28	ATP1B1
export across plasma membrane	GO:0140115	0.0338171061792091	1.4708635588959407	31	ATP1B1
regulation of potassium ion transmembrane transporter activity	GO:1901016	0.0338171061792091	1.4708635588959407	30	ATP1B1
centriole replication	GO:0007099	0.0338171061792091	1.4708635588959407	31	HSPA4L
regulation of sodium ion transmembrane transport	GO:1902305	0.034054547886825715	1.4678248811003614	32	ATP1B1
centriole assembly	GO:0098534	0.03428055977275166	1.4649520950267771	33	HSPA4L
regulation of centrosome cycle	GO:0046605	0.034713413453029	1.459502679012938	39	HSPA4L
regulation of calcium ion transmembrane transporter activity	GO:1901019	0.034713413453029	1.459502679012938	38	ATP1B1
inorganic cation import across plasma membrane	GO:0098659	0.034713413453029	1.459502679012938	37	ATP1B1
regulation of centrosome duplication	GO:0010824	0.034713413453029	1.459502679012938	36	HSPA4L
inorganic ion import across plasma membrane	GO:0099587	0.034713413453029	1.459502679012938	37	ATP1B1
positive regulation of calcium ion transmembrane transport	GO:1904427	0.034713413453029	1.459502679012938	39	ATP1B1
regulation of ATP-dependent activity	GO:0043462	0.03505831052131416	1.45520901662071	41	ATP1B1
regulation of potassium ion transmembrane transport	GO:1901379	0.03505831052131416	1.45520901662071	41	ATP1B1
regulation of cardiac muscle contraction	GO:0055117	0.03605711055070134	1.4430090785610545	43	ATP1B1
regulation of potassium ion transport	GO:0043266	0.0364622704466919	1.4381562920230757	45	ATP1B1
regulation of sodium ion transport	GO:0002028	0.0364622704466919	1.4381562920230757	46	ATP1B1
cellular monovalent inorganic cation homeostasis	GO:0030004	0.0364622704466919	1.4381562920230757	46	ATP1B1
positive regulation of ion transmembrane transporter activity	GO:0032414	0.03891594172670104	1.4098724555978095	50	ATP1B1
regulation of striated muscle contraction	GO:0006942	0.040665660480093235	1.3907721696190778	56	ATP1B1
centrosome duplication	GO:0051298	0.040665660480093235	1.3907721696190778	55	HSPA4L
positive regulation of transporter activity	GO:0032411	0.040665660480093235	1.3907721696190778	55	ATP1B1
positive regulation of calcium ion transport	GO:0051928	0.04425472282889549	1.3540403749304815	63	ATP1B1
positive regulation of organelle assembly	GO:1902117	0.04561806682094843	1.3408631229783485	66	HSPA4L
homeostatic process	GO:0042592	0.04677745854760879	1.3299633774121251	1117	ATP1B1,TXNRD1
sodium ion transmembrane transport	GO:0035725	0.04677745854760879	1.3299633774121251	72	ATP1B1
positive regulation of cation transmembrane transport	GO:1904064	0.04677745854760879	1.3299633774121251	72	ATP1B1
cardiac muscle contraction	GO:0060048	0.04910521700392716	1.3088723653992917	79	ATP1B1
regulation of calcium ion transmembrane transport	GO:1903169	0.04910521700392716	1.3088723653992917	79	ATP1B1
monovalent inorganic cation homeostasis	GO:0055067	0.04910521700392716	1.3088723653992917	79	ATP1B1
positive regulation of ion transmembrane transport	GO:0034767	0.04963336517143101	1.3042262783824152	81	ATP1B1
mesoderm development	GO:0007498	0.054337078522627404	1.2649037154876872	92	TXNRD1
regulation of muscle contraction	GO:0006937	0.054337078522627404	1.2649037154876872	93	ATP1B1
tissue development	GO:0009888	0.054337078522627404	1.2649037154876872	1287	HSPA4L,TXNRD1
formation of primary germ layer	GO:0001704	0.054337078522627404	1.2649037154876872	94	TXNRD1
import across plasma membrane	GO:0098739	0.054337078522627404	1.2649037154876872	95	ATP1B1
centrosome cycle	GO:0007098	0.05643735764593606	1.248433327778298	100	HSPA4L
microtubule organizing center organization	GO:0031023	0.058288315640095595	1.2344184943251104	106	HSPA4L
potassium ion transmembrane transport	GO:0071805	0.058638782001018255	1.231815059099029	108	ATP1B1
positive regulation of transmembrane transport	GO:0034764	0.059313317831585	1.2268477819918218	112	ATP1B1
calcium-mediated signaling	GO:0019722	0.059313317831585	1.2268477819918218	112	ATP1B1
placenta development	GO:0001890	0.05963802343003374	1.2244767587075471	114	HSPA4L
regulation of heart contraction	GO:0008016	0.06098121410555651	1.214803933298046	118	ATP1B1
positive regulation of ion transport	GO:0043270	0.06110073599241194	1.2139535584069039	131	ATP1B1
regulation of transmembrane transporter activity	GO:0022898	0.06110073599241194	1.2139535584069039	128	ATP1B1
regulation of ion transmembrane transporter activity	GO:0032412	0.06110073599241194	1.2139535584069039	124	ATP1B1
protein stabilization	GO:0050821	0.06110073599241194	1.2139535584069039	130	ATP1B1
regulation of muscle system process	GO:0090257	0.06110073599241194	1.2139535584069039	129	ATP1B1
regulation of calcium ion transport	GO:0051924	0.06110073599241194	1.2139535584069039	127	ATP1B1
import into cell	GO:0098657	0.06110073599241194	1.2139535584069039	127	ATP1B1
positive regulation of cytoskeleton organization	GO:0051495	0.06110073599241194	1.2139535584069039	128	HSPA4L
sodium ion transport	GO:0006814	0.06110073599241194	1.2139535584069039	122	ATP1B1
gastrulation	GO:0007369	0.06273937438138051	1.2024598162737359	136	TXNRD1
regulation of transporter activity	GO:0032409	0.06277624156073441	1.202204689245963	139	ATP1B1
regulation of organelle assembly	GO:1902115	0.06478076624503265	1.1885539193387875	148	HSPA4L
second-messenger-mediated signaling	GO:0019932	0.06478076624503265	1.1885539193387875	147	ATP1B1
heart process	GO:0003015	0.06499189752533058	1.1871407830398515	150	ATP1B1
positive regulation of cell cycle process	GO:0090068	0.06689849758071967	1.1745836355913668	156	HSPA4L
multicellular organismal process	GO:0032501	0.06723859363486577	1.172381378858456	5120	ATP1B1,HSPA4L,TXNRD1
potassium ion transport	GO:0006813	0.06809827224031453	1.1668639066777615	162	ATP1B1
regulation of cation transmembrane transport	GO:1904062	0.07315814162564292	1.1357373350706796	177	ATP1B1
muscle contraction	GO:0006936	0.07315814162564292	1.1357373350706796	181	ATP1B1
calcium ion transmembrane transport	GO:0070588	0.07315814162564292	1.1357373350706796	180	ATP1B1
regulation of microtubule-based process	GO:0032886	0.07315814162564292	1.1357373350706796	179	HSPA4L
protein localization to plasma membrane	GO:0072659	0.07525255129620825	1.1234787715469805	188	ATP1B1
ATP metabolic process	GO:0046034	0.07652244457003803	1.1162111645422832	193	ATP1B1
regulation of metal ion transport	GO:0010959	0.07970822140772826	1.0984968815164915	203	ATP1B1
positive regulation of cell cycle	GO:0045787	0.08056994173775991	1.0938269504055793	209	HSPA4L
regulation of ion transmembrane transport	GO:0034765	0.08056994173775991	1.0938269504055793	209	ATP1B1
regulation of protein stability	GO:0031647	0.08136593440513416	1.089557383765078	213	ATP1B1
protein localization to cell periphery	GO:1990778	0.08289449874156012	1.0814742902634806	219	ATP1B1
cellular calcium ion homeostasis	GO:0006874	0.08328447807327669	1.079435931549535	222	ATP1B1
regulation of membrane potential	GO:0042391	0.08330043826260475	1.079352713664879	224	ATP1B1
muscle system process	GO:0003012	0.08477039131358001	1.0717558120658095	230	ATP1B1
calcium ion homeostasis	GO:0055074	0.08513312957091389	1.0699014012558559	233	ATP1B1
cilium assembly	GO:0060271	0.08548938511037303	1.0680878066072828	236	HSPA4L
non-membrane-bounded organelle assembly	GO:0140694	0.0858320710733947	1.066350408098456	240	HSPA4L
cellular divalent inorganic cation homeostasis	GO:0072503	0.0858320710733947	1.066350408098456	241	ATP1B1
calcium ion transport	GO:0006816	0.08860807629654448	1.0525266919823484	251	ATP1B1
cilium organization	GO:0044782	0.08892225381633634	1.0509895382403271	254	HSPA4L
divalent inorganic cation homeostasis	GO:0072507	0.089230993723448	1.049484270454473	257	ATP1B1
regulation of transmembrane transport	GO:0034762	0.0902124098254714	1.0447337158060699	262	ATP1B1
blood circulation	GO:0008015	0.09453579857337759	1.0244037028258273	277	ATP1B1
circulatory system process	GO:0003013	0.09977912663468821	1.0009603017537783	295	ATP1B1
cellular metal ion homeostasis	GO:0006875	0.10098299923711922	0.9957517347220592	313	ATP1B1
regulation of ion transport	GO:0043269	0.10098299923711922	0.9957517347220592	306	ATP1B1
regulation of system process	GO:0044057	0.10098299923711922	0.9957517347220592	304	ATP1B1
reproductive structure development	GO:0048608	0.10098299923711922	0.9957517347220592	310	HSPA4L
regulation of biological quality	GO:0065008	0.10098299923711922	0.9957517347220592	2371	ATP1B1,TXNRD1
reproductive system development	GO:0061458	0.10098299923711922	0.9957517347220592	312	HSPA4L
embryonic organ development	GO:0048568	0.10601358894730838	0.9746384627863864	337	HSPA4L
positive regulation of organelle organization	GO:0010638	0.10601358894730838	0.9746384627863864	336	HSPA4L
in utero embryonic development	GO:0001701	0.10601358894730838	0.9746384627863864	333	HSPA4L
positive regulation of cellular component biogenesis	GO:0044089	0.10601358894730838	0.9746384627863864	339	HSPA4L
cellular cation homeostasis	GO:0030003	0.10646181008900744	0.9728061541224522	343	ATP1B1
regulation of cytoskeleton organization	GO:0051493	0.10895312499462774	0.9627603088003831	357	HSPA4L
metal ion homeostasis	GO:0055065	0.10895312499462774	0.9627603088003831	359	ATP1B1
cellular ion homeostasis	GO:0006873	0.10895312499462774	0.9627603088003831	354	ATP1B1
protein localization to membrane	GO:0072657	0.10947829809248603	0.9606719625844121	366	ATP1B1
plasma membrane bounded cell projection assembly	GO:0120031	0.10947829809248603	0.9606719625844121	364	HSPA4L
cell projection assembly	GO:0030031	0.10958954599205753	0.9602308722613453	369	HSPA4L
cation homeostasis	GO:0055080	0.1183335542276006	0.926892090962553	402	ATP1B1
inorganic ion homeostasis	GO:0098771	0.12037461151514638	0.9194651014632593	412	ATP1B1
localization within membrane	GO:0051668	0.1215362053102475	0.9152943276278952	419	ATP1B1
cellular chemical homeostasis	GO:0055082	0.12325050073396848	0.909211307624301	431	ATP1B1
microtubule cytoskeleton organization	GO:0000226	0.12325891096818486	0.9091816737187404	434	HSPA4L
inorganic cation transmembrane transport	GO:0098662	0.12326690906709184	0.9091534938694917	437	ATP1B1
embryonic morphogenesis	GO:0048598	0.1246306887497549	0.9043750049190706	454	TXNRD1
ion homeostasis	GO:0050801	0.1246306887497549	0.9043750049190706	445	ATP1B1
regulation of cell cycle process	GO:0010564	0.1246306887497549	0.9043750049190706	450	HSPA4L
tissue morphogenesis	GO:0048729	0.1246306887497549	0.9043750049190706	454	TXNRD1
inorganic ion transmembrane transport	GO:0098660	0.12727867738720078	0.8952443462969308	467	ATP1B1
export from cell	GO:0140352	0.13251423343826543	0.8777374713746777	490	ATP1B1
positive regulation of transport	GO:0051050	0.13376132053899872	0.8736694523753836	498	ATP1B1
cation transmembrane transport	GO:0098655	0.1360252613234964	0.8663804310809922	510	ATP1B1
metal ion transport	GO:0030001	0.1474178415863676	0.8314499517985502	565	ATP1B1
organelle assembly	GO:0070925	0.14801612711572296	0.8296909634172231	571	HSPA4L
multicellular organism development	GO:0007275	0.15126155384680603	0.8202714425910577	3321	HSPA4L,TXNRD1
developmental process involved in reproduction	GO:0003006	0.1533815718963067	0.8142268157749277	600	HSPA4L
microtubule-based process	GO:0007017	0.16222303675849542	0.7898874730182536	646	HSPA4L
regulation of cellular component biogenesis	GO:0044087	0.16222303675849542	0.7898874730182536	650	HSPA4L
regulation of cell cycle	GO:0051726	0.16222303675849542	0.7898874730182536	652	HSPA4L
ion transmembrane transport	GO:0034220	0.16222303675849542	0.7898874730182536	648	ATP1B1
positive regulation of cellular component organization	GO:0051130	0.16530492838252644	0.7817141982287384	669	HSPA4L
chemical homeostasis	GO:0048878	0.17163358685754623	0.7653977213848415	700	ATP1B1
anatomical structure development	GO:0048856	0.17733890178985212	0.7511959853270378	3716	HSPA4L,TXNRD1
positive regulation of cellular process	GO:0048522	0.17752992497786754	0.7507284304547819	3730	ATP1B1,HSPA4L
cation transport	GO:0006812	0.18178563426516026	0.7404404401783083	757	ATP1B1
regulation of organelle organization	GO:0033043	0.18188601049969544	0.7402007027860351	762	HSPA4L
anatomical structure formation involved in morphogenesis	GO:0048646	0.18379424537553177	0.7356680905602272	775	TXNRD1
cell cycle process	GO:0022402	0.18477813635447798	0.733349417435933	784	HSPA4L
epithelium development	GO:0060429	0.18775514732339418	0.7264081479402851	802	HSPA4L
developmental process	GO:0032502	0.19511939706109024	0.7096995547066567	4003	HSPA4L,TXNRD1
regulation of cellular process	GO:0050794	0.19862906162674274	0.7019572091096893	8877	ATP1B1,HSPA4L,TXNRD1
reproduction	GO:0000003	0.19881634128984144	0.7015479225526962	872	HSPA4L
reproductive process	GO:0022414	0.19881634128984144	0.7015479225526962	871	HSPA4L
positive regulation of biological process	GO:0048518	0.20036150760851756	0.6981857091466441	4112	ATP1B1,HSPA4L
plasma membrane bounded cell projection organization	GO:0120036	0.20900348188282714	0.6798464787219485	930	HSPA4L
positive regulation of molecular function	GO:0044093	0.2096914079250254	0.6784193643233885	944	ATP1B1
cell projection organization	GO:0030030	0.2096914079250254	0.6784193643233885	942	HSPA4L
cytoskeleton organization	GO:0007010	0.2112765120796026	0.6751487814200526	957	HSPA4L
regulation of transport	GO:0051049	0.21655449519552294	0.6644327968413268	988	ATP1B1
cell cycle	GO:0007049	0.21704801260478274	0.6634441864146743	996	HSPA4L
ion transport	GO:0006811	0.22626268794997736	0.6453870578590666	1047	ATP1B1
transmembrane transport	GO:0055085	0.22749263505903566	0.6430326588090466	1059	ATP1B1
regulation of biological process	GO:0050789	0.23062919778670407	0.6370857116339468	9533	ATP1B1,HSPA4L,TXNRD1
cellular protein localization	GO:0034613	0.23933900054896604	0.6209865268645316	1132	ATP1B1
cellular macromolecule localization	GO:0070727	0.23933900054896604	0.6209865268645316	1137	ATP1B1
protein phosphorylation	GO:0006468	0.2455037649871449	0.6099418432534218	1175	HSPA4L
biological regulation	GO:0065007	0.2612513985654404	0.5829413759521717	10006	ATP1B1,HSPA4L,TXNRD1
cell population proliferation	GO:0008283	0.262287952417136	0.5812216572515094	1276	TXNRD1
phosphorylation	GO:0016310	0.27467184582806087	0.5611858539691186	1349	HSPA4L
regulation of cellular component organization	GO:0051128	0.3011009142787859	0.5212879257704397	1500	HSPA4L
protein localization	GO:0008104	0.3032198878724946	0.5182423171889854	1520	ATP1B1
system process	GO:0003008	0.32545623158040193	0.4875074085127188	1653	ATP1B1
regulation of localization	GO:0032879	0.334112907001045	0.47610674695672206	1721	ATP1B1
regulation of molecular function	GO:0065009	0.334112907001045	0.47610674695672206	1714	ATP1B1
intracellular signal transduction	GO:0035556	0.33523740457111056	0.47464753033847673	1737	ATP1B1
regulation of multicellular organismal process	GO:0051239	0.33822759986376233	0.4707909562312891	1764	ATP1B1
anatomical structure morphogenesis	GO:0009653	0.34303628174855644	0.4646599437185035	1802	TXNRD1
macromolecule localization	GO:0033036	0.34457669557149545	0.46271409812115105	1821	ATP1B1
cellular localization	GO:0051641	0.3529165986239922	0.45232791511330306	1881	ATP1B1
phosphate-containing compound metabolic process	GO:0006796	0.3694243516174416	0.43247448024253665	1992	HSPA4L
phosphorus metabolic process	GO:0006793	0.3697685736736869	0.43207000193851663	2005	HSPA4L
animal organ development	GO:0048513	0.40849963340316164	0.3888083288771114	2261	HSPA4L
organelle organization	GO:0006996	0.42832311547623303	0.36822848723573864	2403	HSPA4L
cell differentiation	GO:0030154	0.4497579609223782	0.34702114070267587	2560	HSPA4L
cellular protein modification process	GO:0006464	0.4520698678784695	0.34479443932761955	2606	HSPA4L
protein modification process	GO:0036211	0.4520698678784695	0.34479443932761955	2606	HSPA4L
cellular developmental process	GO:0048869	0.4520698678784695	0.34479443932761955	2619	HSPA4L
macromolecule modification	GO:0043412	0.4686513850749654	0.32915009510090626	2750	HSPA4L
cellular component assembly	GO:0022607	0.49897752601574424	0.30191901459133613	2985	HSPA4L
transport	GO:0006810	0.5068801378313822	0.29509472633278927	3078	ATP1B1
system development	GO:0048731	0.5068801378313822	0.29509472633278927	3067	HSPA4L
cellular component biogenesis	GO:0044085	0.5119626710123042	0.29076170379835964	3134	HSPA4L
establishment of localization	GO:0051234	0.5186221115929346	0.28514897091012537	3203	ATP1B1
cellular protein metabolic process	GO:0044267	0.5552970120948797	0.25547466334392416	3513	HSPA4L
regulation of gene expression	GO:0010468	0.555506088344266	0.2553111768314327	3535	ATP1B1
macromolecule metabolic process	GO:0043170	0.5980374154259417	0.22327164409736597	8971	ATP1B1,HSPA4L
protein metabolic process	GO:0019538	0.6139404460629189	0.2118737545927849	4081	HSPA4L
cellular macromolecule metabolic process	GO:0044260	0.6250503696631481	0.2040849836393999	4207	HSPA4L
localization	GO:0051179	0.6380131480530334	0.19517037132892673	4354	ATP1B1
regulation of macromolecule metabolic process	GO:0060255	0.6473091865333113	0.188888229483824	4470	ATP1B1
organonitrogen compound metabolic process	GO:1901564	0.6697646121000552	0.1740778027138582	4721	HSPA4L
regulation of metabolic process	GO:0019222	0.6734084128603155	0.1717214622930602	4788	ATP1B1
organic substance metabolic process	GO:0071704	0.6889385638137818	0.16181950463270348	10150	ATP1B1,HSPA4L
cellular component organization	GO:0016043	0.6902814647989921	0.16097378798152193	5028	HSPA4L
signal transduction	GO:0007165	0.6920088848074243	0.15988832953447585	5079	ATP1B1
cellular component organization or biogenesis	GO:0071840	0.6962892795383266	0.1572102914152427	5159	HSPA4L
metabolic process	GO:0008152	0.7090168051768659	0.14934347101004206	10511	ATP1B1,HSPA4L
signaling	GO:0023052	0.7105571568798855	0.14840098188972964	5390	ATP1B1
cell communication	GO:0007154	0.7118931807478625	0.1475851671666065	5441	ATP1B1
cellular response to stimulus	GO:0051716	0.7602512409376014	0.11904286229607904	6088	ATP1B1
gene expression	GO:0010467	0.7673736665654887	0.11499310826713202	6228	ATP1B1
cellular process	GO:0009987	0.7895675215619367	0.10261072444243796	15498	ATP1B1,HSPA4L,TXNRD1
response to stimulus	GO:0050896	0.8117774170351002	0.09056303455785647	6986	ATP1B1
nitrogen compound metabolic process	GO:0006807	0.9073418207879473	0.04222907135697825	8950	HSPA4L
primary metabolic process	GO:0044238	0.916393104239844	0.037918187489898926	9392	HSPA4L
cellular metabolic process	GO:0044237	0.916393104239844	0.037918187489898926	9387	HSPA4L
biological_process	GO:0008150	1	0	16883	ATP1B1,HSPA4L,TXNRD1

## Sheet: CC
Supplementary Table S2C. Gene ontology of cellular components (GO:CC) categories of TXNRD1, HSPA4L and ATP1B1 of boar sperm.
Functional category	id	Adjusted p-value	Negative log10 (adjusted p-value)	Total number of genes	Genes in list
cation-transporting ATPase complex	GO:0090533	0.025051887848907484	1.6011595411951287	9	ATP1B1
ATPase dependent transmembrane transport complex	GO:0098533	0.025051887848907484	1.6011595411951287	11	ATP1B1
sodium:potassium-exchanging ATPase complex	GO:0005890	0.025051887848907484	1.6011595411951287	8	ATP1B1
intercalated disc	GO:0014704	0.04123458904036248	1.3847383294236888	29	ATP1B1
lateral plasma membrane	GO:0016328	0.048002363987665025	1.3187373742594648	38	ATP1B1
cell-cell contact zone	GO:0044291	0.05227246803317982	1.2817269942988996	46	ATP1B1
sarcolemma	GO:0042383	0.056787529998036164	1.2457470207610175	55	ATP1B1
nucleolus	GO:0005730	0.07688578427817509	1.1141539512292569	1289	HSPA4L,TXNRD1
centriole	GO:0005814	0.07688578427817509	1.1141539512292569	95	HSPA4L
sperm flagellum	GO:0036126	0.07688578427817509	1.1141539512292569	93	ATP1B1
9+2 motile cilium	GO:0097729	0.08001676808235487	1.0968189939760793	106	ATP1B1
fibrillar center	GO:0001650	0.08208524936243315	1.0857348781552498	127	TXNRD1
basal plasma membrane	GO:0009925	0.08208524936243315	1.0857348781552498	138	ATP1B1
motile cilium	GO:0031514	0.08208524936243315	1.0857348781552498	137	ATP1B1
basolateral plasma membrane	GO:0016323	0.08208524936243315	1.0857348781552498	121	ATP1B1
basal part of cell	GO:0045178	0.08638002919148242	1.0635866535219356	153	ATP1B1
apical plasma membrane	GO:0016324	0.09875265431655307	1.0054512223897052	184	ATP1B1
apical part of cell	GO:0045177	0.11878475809911422	0.925239282402974	237	ATP1B1
transporter complex	GO:1990351	0.11878475809911422	0.925239282402974	254	ATP1B1
transmembrane transporter complex	GO:1902495	0.11878475809911422	0.925239282402974	247	ATP1B1
cell-cell junction	GO:0005911	0.13607426522245675	0.866224002119792	304	ATP1B1
cytosol	GO:0005829	0.14355692174877435	0.8429758626949844	2474	HSPA4L,TXNRD1
plasma membrane protein complex	GO:0098797	0.15274533301313548	0.8160320503332394	370	ATP1B1
anchoring junction	GO:0070161	0.16359811237595853	0.7862217116025596	412	ATP1B1
cilium	GO:0005929	0.16729107775964844	0.7765272209209274	437	ATP1B1
centrosome	GO:0005813	0.1800368484206648	0.7446385980746734	488	HSPA4L
microtubule organizing center	GO:0005815	0.20525079844491823	0.6877151447588377	578	HSPA4L
intracellular organelle lumen	GO:0070013	0.21171185927019057	0.6742548138211766	3948	HSPA4L,TXNRD1
intrinsic component of plasma membrane	GO:0031226	0.21171185927019057	0.6742548138211766	701	ATP1B1
intracellular non-membrane-bounded organelle	GO:0043232	0.21171185927019057	0.6742548138211766	3739	HSPA4L,TXNRD1
non-membrane-bounded organelle	GO:0043228	0.21171185927019057	0.6742548138211766	3739	HSPA4L,TXNRD1
nuclear lumen	GO:0031981	0.21171185927019057	0.6742548138211766	3697	HSPA4L,TXNRD1
membrane-enclosed lumen	GO:0031974	0.21171185927019057	0.6742548138211766	3948	HSPA4L,TXNRD1
integral component of plasma membrane	GO:0005887	0.21171185927019057	0.6742548138211766	649	ATP1B1
chromosome	GO:0005694	0.21171185927019057	0.6742548138211766	778	HSPA4L
organelle lumen	GO:0043233	0.21171185927019057	0.6742548138211766	3948	HSPA4L,TXNRD1
plasma membrane region	GO:0098590	0.21171185927019057	0.6742548138211766	629	ATP1B1
membrane protein complex	GO:0098796	0.21171185927019057	0.6742548138211766	816	ATP1B1
microtubule cytoskeleton	GO:0015630	0.22170241483494973	0.6542295764219045	882	HSPA4L
cell junction	GO:0030054	0.25282700077304765	0.5971765472386937	1047	ATP1B1
membrane-bounded organelle	GO:0043227	0.25282700077304765	0.5971765472386937	9520	ATP1B1,HSPA4L,TXNRD1
plasma membrane bounded cell projection	GO:0120025	0.25282700077304765	0.5971765472386937	1095	ATP1B1
cell projection	GO:0042995	0.25282700077304765	0.5971765472386937	1115	ATP1B1
organelle	GO:0043226	0.31174443115835926	0.5062012957926326	10503	ATP1B1,HSPA4L,TXNRD1
cytoskeleton	GO:0005856	0.31174443115835926	0.5062012957926326	1447	HSPA4L
organelle membrane	GO:0031090	0.31174443115835926	0.5062012957926326	1497	ATP1B1
nucleus	GO:0005634	0.4123920610338756	0.3846897039180238	6465	HSPA4L,TXNRD1
cytoplasm	GO:0005737	0.4660183212891194	0.3315970088929306	7050	HSPA4L,TXNRD1
nucleoplasm	GO:0005654	0.5064433672506321	0.29546911232871875	2793	TXNRD1
plasma membrane	GO:0005886	0.5571963471893164	0.25399173934197805	3215	ATP1B1
cell periphery	GO:0071944	0.582190568201533	0.23493483464301457	3479	ATP1B1
intracellular membrane-bounded organelle	GO:0043231	0.6497000611017787	0.18728709239091254	9197	HSPA4L,TXNRD1
intracellular organelle	GO:0043229	0.7061323892615365	0.1511138675946571	10275	HSPA4L,TXNRD1
integral component of membrane	GO:0016021	0.7061323892615365	0.1511138675946571	4924	ATP1B1
intrinsic component of membrane	GO:0031224	0.7061323892615365	0.1511138675946571	4991	ATP1B1
protein-containing complex	GO:0032991	0.7061323892615365	0.1511138675946571	4836	ATP1B1
intracellular anatomical structure	GO:0005622	0.7963219277857435	0.09891132523163575	11467	HSPA4L,TXNRD1
membrane	GO:0016020	0.8605439263811087	0.06522695625097553	7583	ATP1B1
cellular anatomical entity	GO:0110165	0.9788914797045876	0.009265451585818039	16644	ATP1B1,HSPA4L,TXNRD1
cellular_component	GO:0005575	1	0	16851	ATP1B1,HSPA4L,TXNRD1

## Sheet: KEGG_Pathways
Supplementary Table S2D. KEGG pathways of TXNRD1, HSPA4L and ATP1B1 of boar sperm.
Functional category	id	Adjusted p-value	Negative log10 (adjusted p-value)	Total number of genes	Genes in list
Selenocompound metabolism	KEGG:00450	0.06021940625982118	1.2202635307786651	16	TXNRD1
Insulin secretion	KEGG:04911	0.06021940625982118	1.2202635307786651	82	ATP1B1
Thyroid hormone synthesis	KEGG:04918	0.06021940625982118	1.2202635307786651	71	ATP1B1
Aldosterone synthesis and secretion	KEGG:04925	0.06021940625982118	1.2202635307786651	88	ATP1B1
Aldosterone-regulated sodium reabsorption	KEGG:04960	0.06021940625982118	1.2202635307786651	35	ATP1B1
Endocrine and other factor-regulated calcium reabsorption	KEGG:04961	0.06021940625982118	1.2202635307786651	48	ATP1B1
Proximal tubule bicarbonate reclamation	KEGG:04964	0.06021940625982118	1.2202635307786651	21	ATP1B1
Salivary secretion	KEGG:04970	0.06021940625982118	1.2202635307786651	77	ATP1B1
Mineral absorption	KEGG:04978	0.06021940625982118	1.2202635307786651	52	ATP1B1
Gastric acid secretion	KEGG:04971	0.06021940625982118	1.2202635307786651	69	ATP1B1
Cardiac muscle contraction	KEGG:04260	0.06021940625982118	1.2202635307786651	79	ATP1B1
Bile secretion	KEGG:04976	0.06021940625982118	1.2202635307786651	78	ATP1B1
Carbohydrate digestion and absorption	KEGG:04973	0.06021940625982118	1.2202635307786651	46	ATP1B1
Pancreatic secretion	KEGG:04972	0.06021940625982118	1.2202635307786651	94	ATP1B1
Protein digestion and absorption	KEGG:04974	0.06021940625982118	1.2202635307786651	100	ATP1B1
Thyroid hormone signaling pathway	KEGG:04919	0.0653549910579952	1.1847212404296283	116	ATP1B1
FoxO signaling pathway	KEGG:04068	0.06776979582795901	1.1689638227696593	128	HSPA4L
Hepatocellular carcinoma	KEGG:05225	0.0691326312419721	1.1603169132156126	155	TXNRD1
cGMP-PKG signaling pathway	KEGG:04022	0.0691326312419721	1.1603169132156126	159	ATP1B1
Adrenergic signaling in cardiomyocytes	KEGG:04261	0.0691326312419721	1.1603169132156126	139	ATP1B1
Protein processing in endoplasmic reticulum	KEGG:04141	0.0691326312419721	1.1603169132156126	162	HSPA4L
cAMP signaling pathway	KEGG:04024	0.08501867014610412	1.0704856925084592	210	ATP1B1
Pathways in cancer	KEGG:05200	0.18546913050189376	0.7317283640452175	497	TXNRD1
